# Supplementary material for: Comprehensive Study of Antiretroviral Drug Permeability at the Cervicovaginal Mucosa via an In Vitro Model
Source: MDPI journal article supplement (doi:10.3390/pharmaceutics14091938), 2022-09-13
Supplement: s1 [file s1]

## SUPPLEMENTAL FIGURES

**Figure S1**

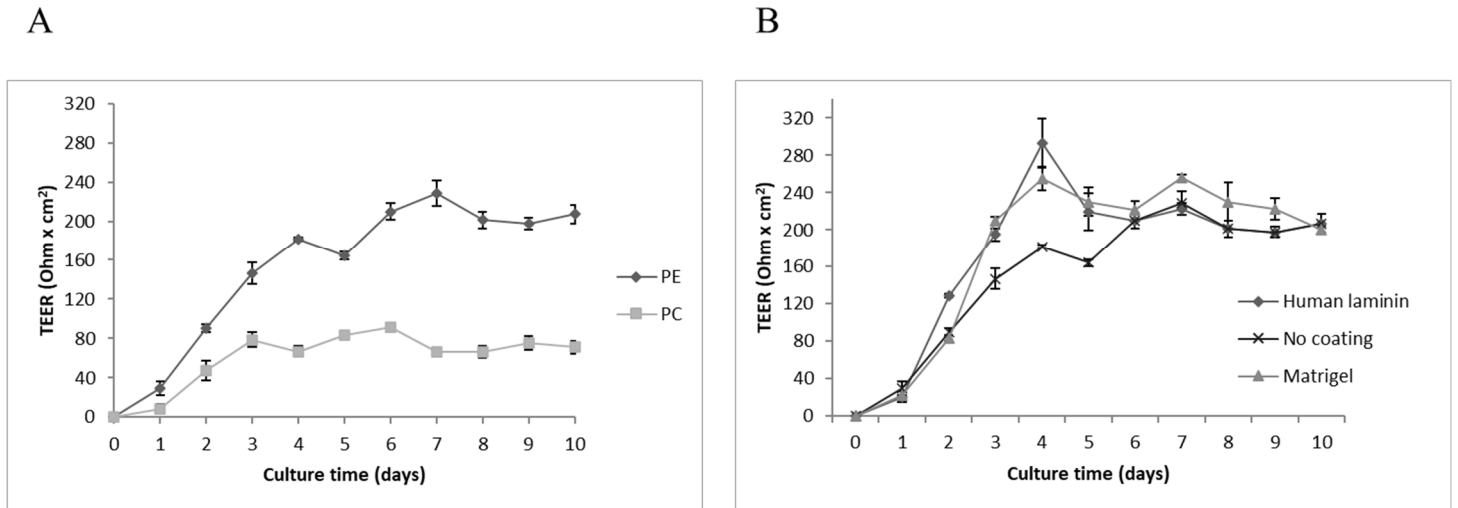

**Figure S1. Barrier function of HEC-1A cultures.** **A)** Barrier function on polyester and polycarbonate membranes. Transepithelial Electrical Resistance (TEER) of HEC-1A cell monolayers grown on either polycarbonate (PC) or polyester (PE) membranes was measured with an Epithelial Voltohmmeter. **B)** Effect of laminin or Matrigel coating. Transepithelial Electrical Resistance (TEER) of HEC-1A cell monolayers grown on semi-permeable membranes coated with either human laminin (5  $\mu\text{g}/\text{cm}^2$ ) or Matrigel<sup>®</sup> (15  $\mu\text{g}/\text{cm}^2$ ) is shown in comparison to TEER measured in the absence of coating. Cell density was  $2 \times 10^5$  cells/Transwell<sup>®</sup> insert (surface area 1.12  $\text{cm}^2$ ). TEER values are shown in relation to time.

**FIGURE S2**

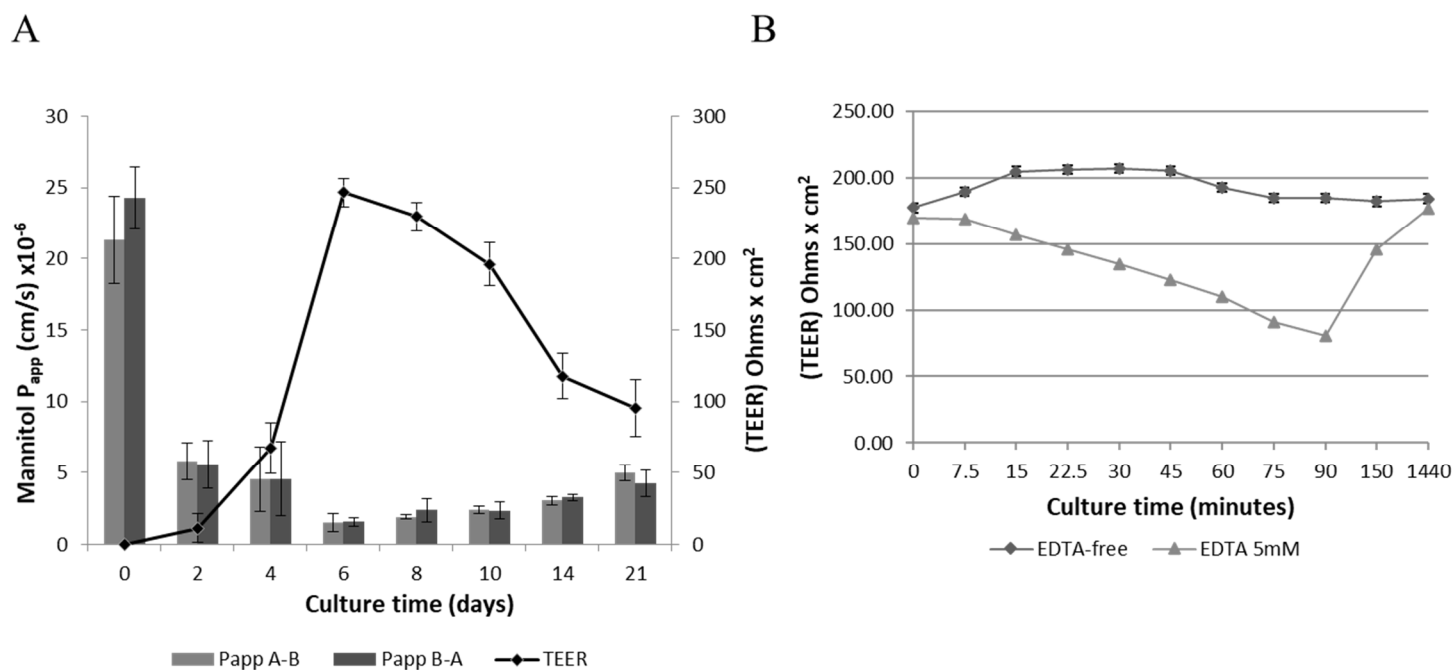

**Figure S2. HEC-1A barrier integrity over time and calcium-dependence. A)** Barrier integrity assessed by measurement of TEER and by determination of the bi-directional permeability of the para-cellular marker <sup>3</sup>H-mannitol. TEER and <sup>3</sup>H-mannitol  $P_{app}$  values are shown in relation to time. **B)** Effect of EDTA supplementation on barrier integrity. TEER readings over 24 hours in the presence and absence of EDTA.

**FIGURE S3**

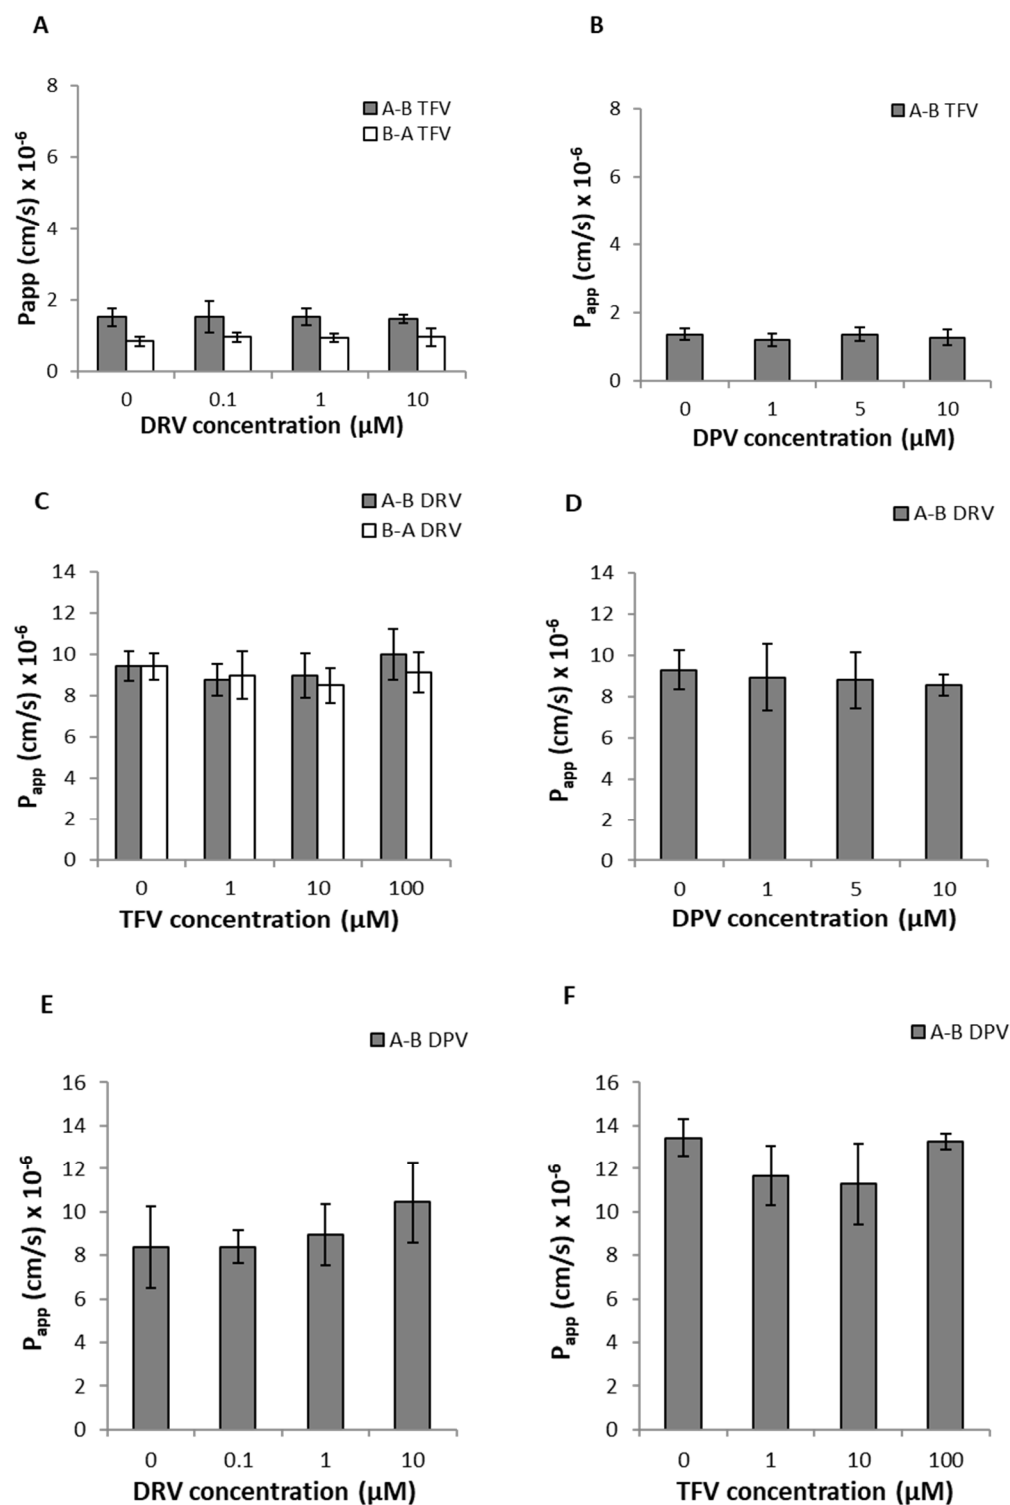

**Figure S3. Permeability of ARV drug combinations.** Permeability of labelled tenofovir (TFV) (A-B), darunavir (DRV) (C-D) and dapivirine (DPV) (E-F) at 10 $\mu$ M in the presence of either of the other non-labelled drugs at 0-10 $\mu$ M for darunavir and dapivirine and 0-100  $\mu$ M for tenofovir.

**FIGURE S4**

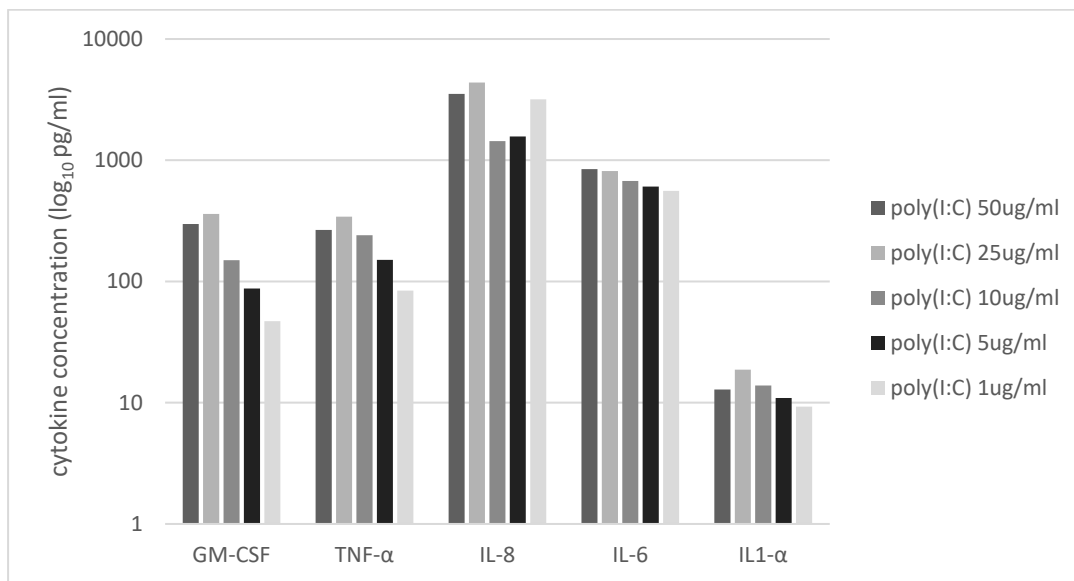

**Figure S4. Cytokine production in HEC-1A cells stimulated with poly(I:C).** GM-CSF, TNF-α, IL-8, IL-6 and IL-1α production in response to stimulation with poly:IC at 1-50 µg/ml. Cytokine concentrations (shown in log<sub>10</sub> pg/ml) were measured using a Magnetic Luminex® Performance Assay kit and analysed using a Luminex® 100 instrument.
